# Supplementary material for: Novel Emblica officinalis extract containing β-glucogallin vs. metformin: a randomized, open-label, comparative efficacy study in newly diagnosed type 2 diabetes mellitus patients with dyslipidemia
Source: Royal Society of Chemistry journal article supplement (doi:10.1039/d2fo01862d), 2022-01-01
Supplement: d2fo01862d1.pdf [file d2fo01862d1.pdf]

**Title:**

**Novel *Emblica officinalis* extract containing  $\beta$ -Glucogallin vs. Metformin: A randomized, open-label, comparative efficacy study in newly diagnosed type 2 diabetes mellitus patients with dyslipidemia**

**Supplementary material**

**Supplementary Fig. 1: A typical HPLC chromatogram of EOE.**

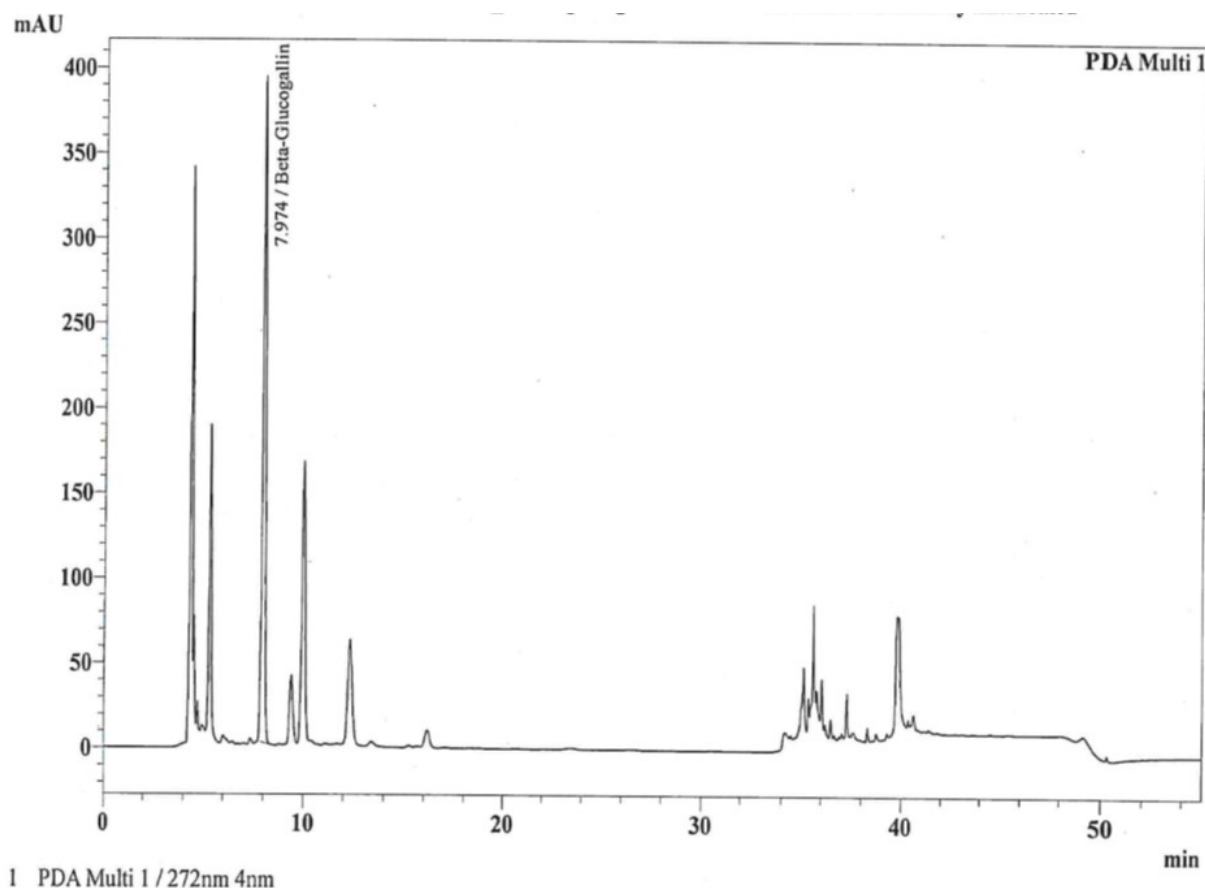

**Supplementary Table 1: Baseline demographics**

| PARAMETER                  |        | Metformin<br>(N = 42) | EOE-1g<br>(N = 42) | EOE-2g<br>(N = 42) | p value |
|----------------------------|--------|-----------------------|--------------------|--------------------|---------|
| Age (Years)                |        | 48.12 ± 10.42         | 46.17 ± 9.61       | 46.71 ± 9.77       | 0.635   |
| Gender, (%)                | Male   | 23 (54.76 %)          | 29 (69.05 %)       | 23 (54.76 %)       | 0.305   |
|                            | Female | 19 (45.24 %)          | 13 (30.95 %)       | 19 (45.24 %)       |         |
| Height (Cm)                |        | 159.13 ± 5.99         | 161.75 ± 6.08      | 159.93 ± 5.87      | 0.246   |
| Weight (Kg)                |        | 71.04 ± 6.47          | 74.72 ± 6.28       | 72.89 ± 6.21       | 0.820   |
| BMI (kg/m <sup>2</sup> )   |        | 27.92 ± 1.54          | 28.50 ± 1.13       | 28.38 ± 1.17       | 0.123   |
| SBP (mmHg)                 |        | 119.17 ± 18.97        | 121.68 ± 7.19      | 122.07 ± 8.46      | 0.534   |
| DBP (mmHg)                 |        | 77.37 ± 6.00          | 77.90 ± 4.64       | 77.26 ± 6.02       | 0.936   |
| Body Temperature (°F)      |        | 97.78 ± 1.56          | 98.23 ± 0.61       | 98.15 ± 0.75       | 0.134   |
| Pulse Rate (beats/min)     |        | 81.56 ± 5.78          | 80.59 ± 5.28       | 79.88 ± 5.85       | 0.417   |
| Respiratory Rate (per min) |        | 18.02 ± 1.33          | 19.73 ± 10.14      | 18.10 ± 1.59       | 0.421   |
| Smoking History, (%)       | Yes    | 0 (0.00 %)            | 0 (0.00 %)         | 0 (0.00 %)         | NS      |
|                            | No     | 42 (100.00 %)         | 42 (100.00 %)      | 42 (100.00 %)      |         |
| Alcohol History, (%)       | Yes    | 0 (0.00 %)            | 0 (0.00 %)         | 0 (0.00 %)         | NS      |
|                            | No     | 42 (100.00 %)         | 42 (100.00 %)      | 42 (100.00 %)      |         |
| Drug Abuse History, (%)    | Yes    | 0 (0.00 %)            | 0 (0.00 %)         | 0 (0.00 %)         | NS      |
|                            | No     | 42 (100.00 %)         | 42 (100.00 %)      | 42 (100.00 %)      |         |

Values are expressed as Mean ± SD. One-way ANOVA was used to compare the means between the groups.

BMI: Body Mass Index, EOE: *Emblca officinalis* Extract, DBP: Diastolic Blood Pressure SBP: Systolic Blood Pressure, NS: Not Significant.

**Supplementary Table 2.** Sub-analysis of the lipid parameters for male and female from screening to day 90.

| Parameters   |        | Visits    | Metformin<br>(N = 41) | EOE-1g<br>(N = 41) | EOE-2g<br>(N = 42) |
|--------------|--------|-----------|-----------------------|--------------------|--------------------|
| TC (mg/dL)   | Female | Screening | 240.05 ±18.01         | 240.91 ±19.70      | 235.73 ± 19.94     |
|              |        | Day 90    | 208.38 ±26.95***      | 211.58 ±11.74***   | 196.36 ±31.63***   |
|              | Male   | Screening | 246.30±20.65          | 247.76±16.15       | 237.27 ±14.82      |
|              |        | Day 90    | 216.56 ± 34.24***     | 223.14 ± 17.64***  | 205.32 ± 21.76***# |
| TG (mg/dL)   | Female | Screening | 171.22±15.06          | 202.8 ± 70.89      | 176.42 10.09       |
|              |        | Day 90    | 148.55 ±22.45**       | 189.8 ± 93.08*     | 150.15 ± 16.62***  |
|              | Male   | Screening | 175.34 ±11.38         | 174.16 ±9.39       | 177.09±21.43       |
|              |        | Day 90    | 156.87 ± 15.70***     | 156.96 ± 18.29***  | 156.27 ±23.97***   |
| LDL (mg/dL)  | Female | Screening | 164.43 ±14.95         | 153.90 ±13.30      | 163.51 ±13.87      |
|              |        | Day 90    | 129.46 ± 35.15***     | 129.41 ± 12.91***  | 122.36 ± 28.89***  |
|              | Male   | Screening | 170.0 ± 15.54         | 166.86 ±12.61      | 164.3 ± 12.67      |
|              |        | Day 90    | 140.87 ± 35.77***     | 145.60 ± 21.84***  | 130.8 ±22.37***    |
| VLDL (mg/dL) | Female | Screening | 34.65 ± 1.80          | 36.56 ± 5.22       | 34.20 ± 3.90       |
|              |        | Day 90    | 29.58 ± 4.55***       | 32.75 ± 6.60***    | 29.86 ± 3.25***    |
|              | Male   | Screening | 35.30 ± 2.09          | 33.89 ± 4.12       | 37.57 ± 13.27      |
|              |        | Day 90    | 31.18 ± 3.1***        | 31.25 ± 3.63**     | 31.04 ± 4.64*      |
| HDL (mg/dL)  | Female | Screening | 49.94 ± 13.89         | 44.78± 7.12        | 44.94 ± 8.34       |
|              |        | Day 90    | 50.55 ± 14.17         | 45.24± 8.63        | 46.42 ± 8.13       |
|              | Male   | Screening | 43.08 ± 7.83          | 44.23± 7.94        | 41.63 ± 5.17       |
|              |        | Day 90    | 44.91± 7.56           | 45.83 ± 8.17       | 43.81 ± 5.05       |

Lipid levels at the Screening visit and Day 90; Data represented as Mean ± Standard deviation.

\*p<0.05, \*\*p<0.01; \*\*\*/\*\*\*# p<0.00, EOE-1 mg or EOE-2 mg treatment compared to screening visit.

**Supplementary Table 3. Body weight and blood pressure parameters**

| Parameters                    | Visits    | Metformin<br>(N=41) | EOE-1g<br>(N= 41) | EOE-2g<br>(N=42) |
|-------------------------------|-----------|---------------------|-------------------|------------------|
| <b>Body Weight (Kg)</b>       | Screening | 71.04 ±6.55         | 74.54 ±6.25       | 72.89 ±6.21      |
|                               | Day 90    | 71.03±6.50          | 74.42±6.08        | 72.72± 6.25      |
| <b>BMI (Kg/m<sup>2</sup>)</b> | Screening | 27.93±1.56          | 28.49±1.14        | 28.38±1.17       |
|                               | Day 90    | 28.01±1.46          | 28.46±1.07        | 28.31±1.12       |
| <b>SBP (mmHg)</b>             | Screening | 119.17±18.17        | 121.68±7.19       | 122.07±8         |
|                               | Day 90    | 118.10±4.65         | 118.24±4.04*      | 118.88±3.97*     |
| <b>DBP (mmHg)</b>             | Screening | 77.37±6.00          | 77.90±4.64        | 77.26±6.02       |
|                               | Day 90    | 78.39±3.85          | 79.32±2.84        | 78.05±3.92       |

Values are expressed as Mean ± SD. \*p<0.05 compared to the screening visit. No significant difference was observed between the groups. BMI: Body Mass Index, EOE: *E. officinalis* Extract, DBP: Diastolic Blood Pressure SBP: Systolic Blood Pressure.

**Supplementary Table 4: Safety parameters**

| <b>Parameters</b>                                  | <b>Visits</b> | <b>Metformin<br/>(N = 41)</b> | <b>EOE-1g<br/>(N = 41)</b> | <b>EOE-2g<br/>(N = 42)</b> |
|----------------------------------------------------|---------------|-------------------------------|----------------------------|----------------------------|
| <b>Hemoglobin<br/>(g/dL)</b>                       | Screening     | 13.51±1.92                    | 13.91±1.74                 | 13.73±1.61                 |
|                                                    | Day 90        | 13.78±1.26                    | 14.00±1.68                 | 13.90±1.67                 |
| <b>RBC (million/μl)</b>                            | Screening     | 4.86±0.52                     | 4.93±0.79                  | 4.84±0.41                  |
|                                                    | Day 90        | 4.83±0.52                     | 4.98±0.82                  | 4.90±0.52                  |
| <b>Total leucocytes<br/>(cells/mm<sup>3</sup>)</b> | Screening     | 7955.85±1170.95               | 7990.24±1384.54            | 8043.81±1438.03            |
|                                                    | Day 90        | 8051.71±1042.41               | 7933.41±1243.27            | 8039.76±1234.41            |
| <b>ALT(IU/L)</b>                                   | Screening     | 18.61±4.81                    | 21.61±7.03                 | 21.90±6.61                 |
|                                                    | Day 90        | 20.17±4.13                    | 21.12±5.74                 | 21.38±5.73                 |
| <b>AST(IU/L)</b>                                   | Screening     | 17.90±3.91                    | 18.61±4.86                 | 18.81±4.47                 |
|                                                    | Day 90        | 19.12±2.79                    | 19.73±4.27                 | 19.21±3.23                 |
| <b>ALP(IU/L)</b>                                   | Screening     | 116.66±37.10                  | 120.90±36.91               | 118.50±41.04               |
|                                                    | Day 90        | 117.29±37.97                  | 116.20±31.26               | 108.74±34.19               |
| <b>Uric Acid (mg/dL)</b>                           | Screening     | 4.47±1.42                     | 4.41±1.67                  | 4.53±1.44                  |
|                                                    | Day 90        | 4.40±1.54                     | 4.37±1.67                  | 4.55±1.49                  |
| <b>Serum Creatinine<br/>(mg/dL)</b>                | Screening     | 0.95±0.15                     | 0.96±0.18                  | 0.95±0.16                  |
|                                                    | Day 90        | 1.11±0.97                     | 0.96±0.16                  | 0.96±0.22                  |

Values are expressed as Mean ± SD. No significant difference was observed between Screening and final visit in all the three groups.
